# Supplementary material for: A flexible, electrochromic, rechargeable Zn-ion battery based on actiniae-like self-doped polyaniline cathode
Source: Royal Society of Chemistry journal article supplement (doi:10.1039/d0ta04203j), 2020-01-01
Supplement: d0ta04203j1.pdf [file d0ta04203j1.pdf]

## Supporting Information

### **A flexible, electrochromic, rechargeable Zn-ion battery based on actiniae-like self-doped polyaniline cathode**

Yi Wang, Hedong Jiang, Rongzong Zheng, Jianbo Pan, Junlong Niu, Xinlei Zou and Chunyang Jia\*

*State Key Laboratory of Electronic Thin Films and Integrated Devices, National Engineering Research Center of Electromagnetic Radiation Control Materials, School of Electronic Science and Engineering, University of Electronic Science and Technology of China, Chengdu 610054, P. R. China*

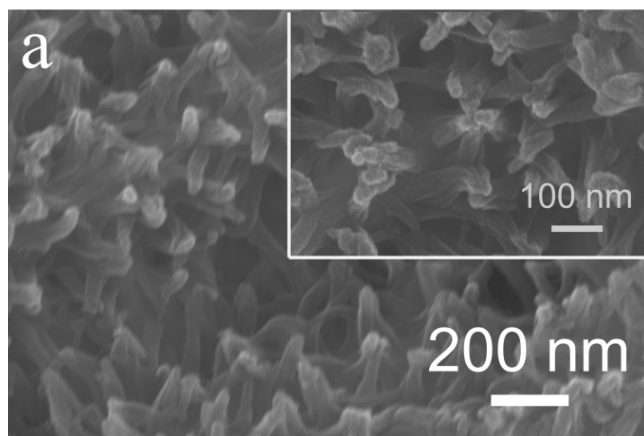

**Fig. S1** Surface SEM image of NPANI film.

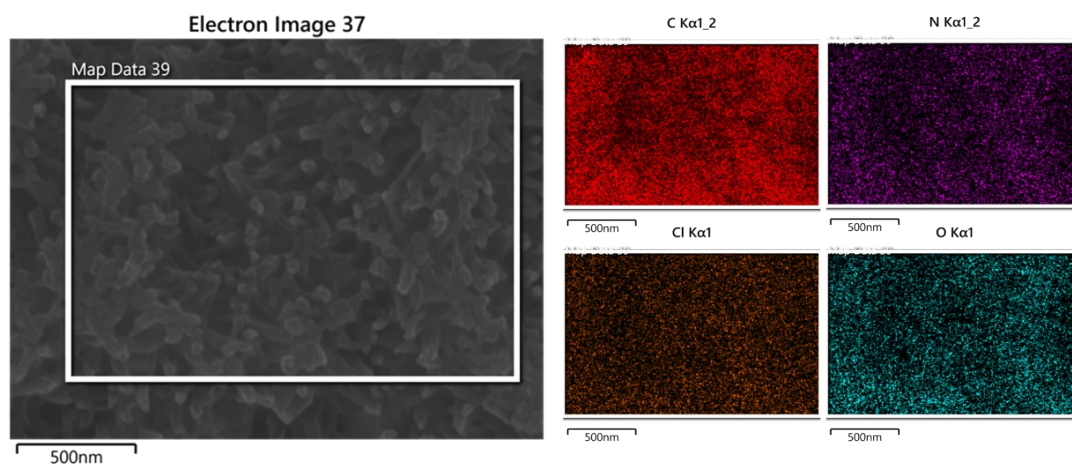

**Fig. S2** EDS mapping of NPANI film.

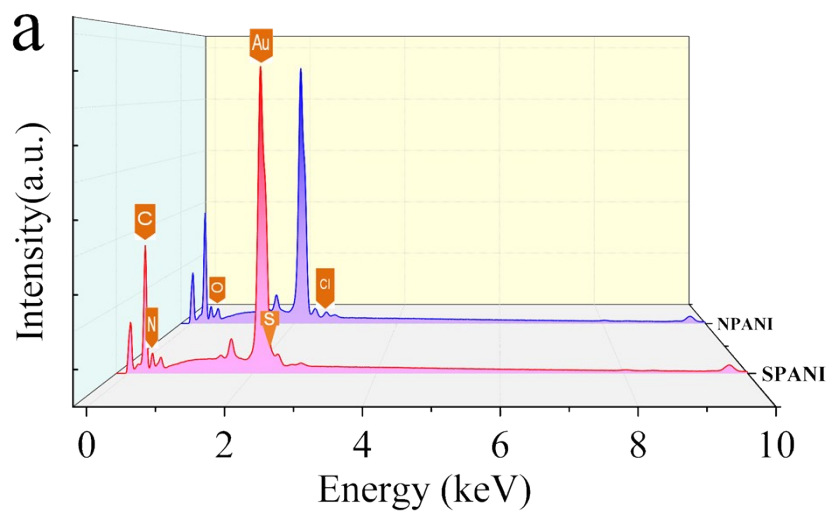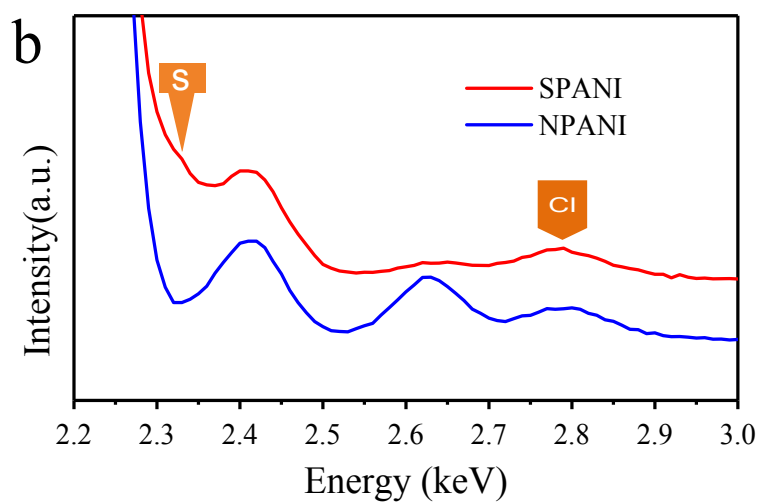

**Fig. S3** (a) and (b) EDS spectrum of SPANI and NPANI film.

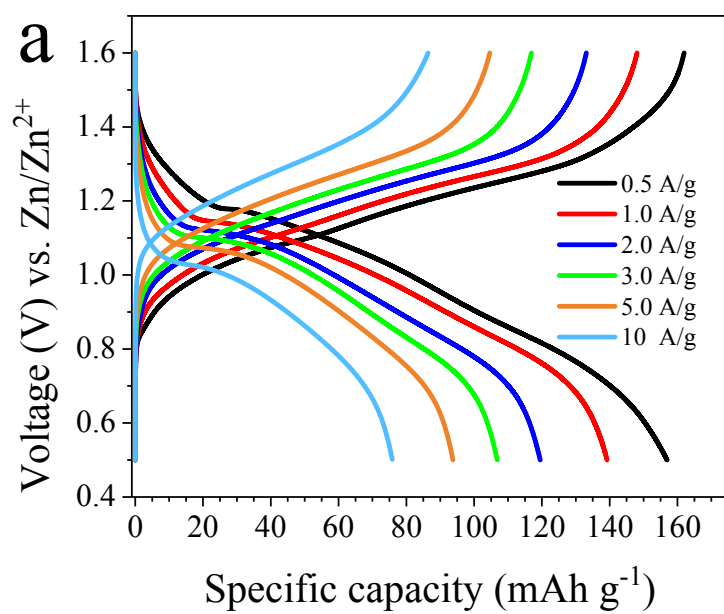

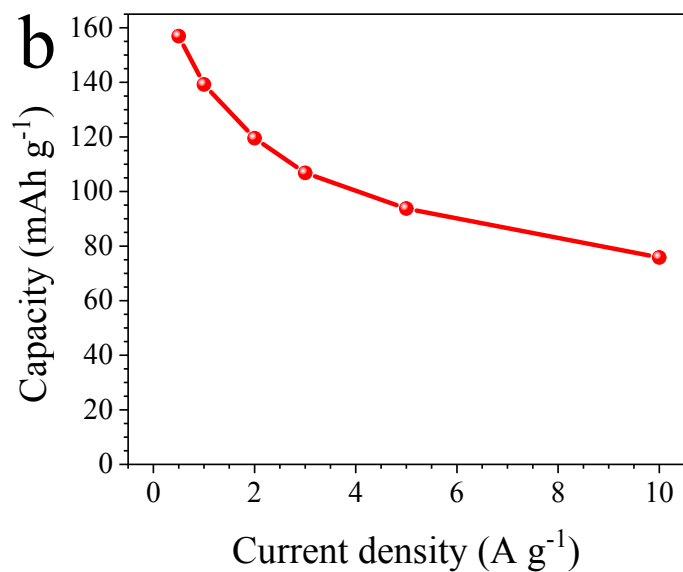

**Fig. S4** (a) Galvanostatic discharge-charge profiles of the EC-ZIB obtained based NPANI cathode at different current densities. (b) specific capacity versus current density based NPANI cathode

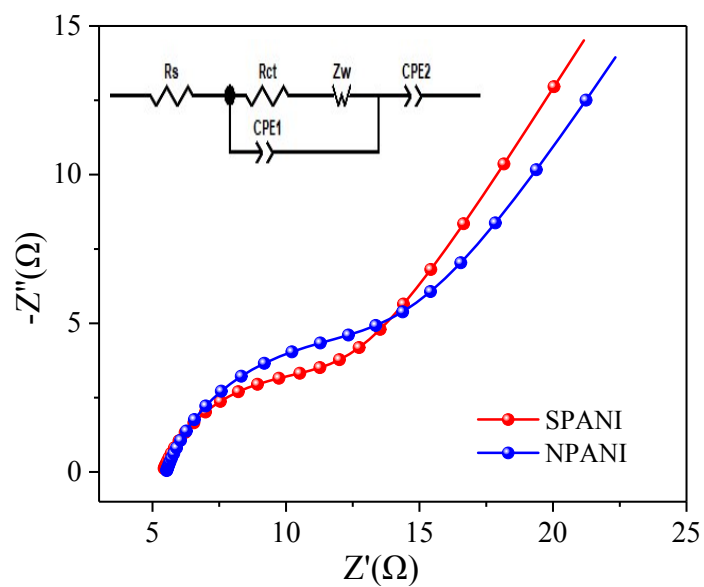

**Fig. S5** Fitted Nyquist plot and the equivalent circuit of the EC-ZIB;

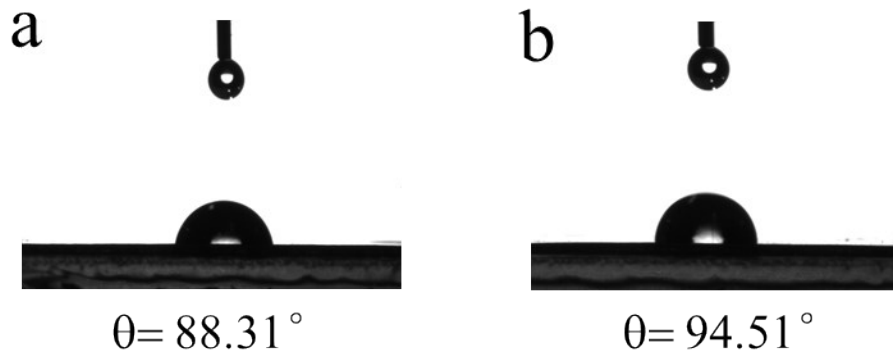

**Fig. S6** Water contact angle: (a) SPANI; (b)NPANI

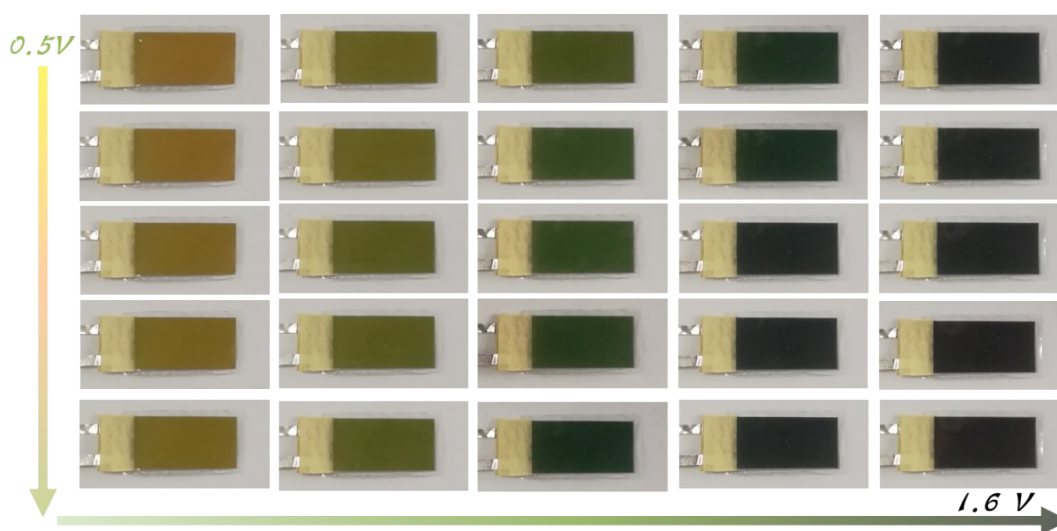

**Fig. S7** Real image of the all-in-one EC-ZIB at different voltages.

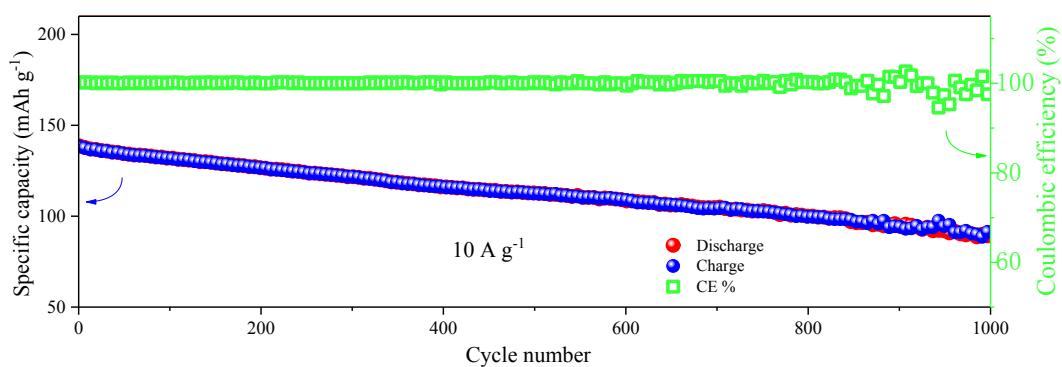

**Fig. S8** Cycling stability of the SPANI based EC-ZIB under nearly  $150^\circ$  bending conditions.
